# Supplementary material for: Formulation and Evaluation of Galantamine Gel as Drug Reservoir in Transdermal Patch Delivery System
Source: Hindawi journal article supplement (doi:10.1155/2015/495271), 2015-01-01
Supplement: f1 [file 495271.f1.pdf]

## SUPPORTING INFORMATION

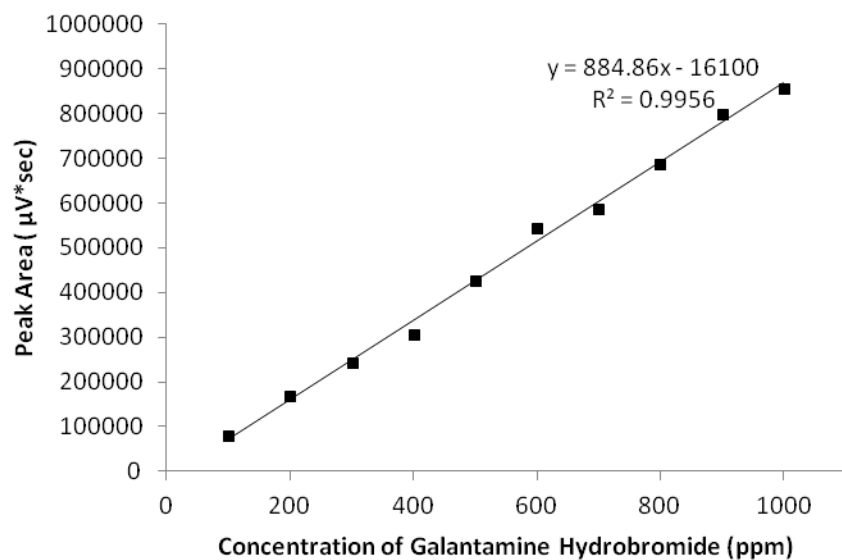

**Supplementary Figure S1.** Standard Calibration Curve for Galantamine Hydrobromide with line equation ( $y = 884.86x - 16100$ ) and correlation coefficient ( $R^2 = 0.9956$ ).

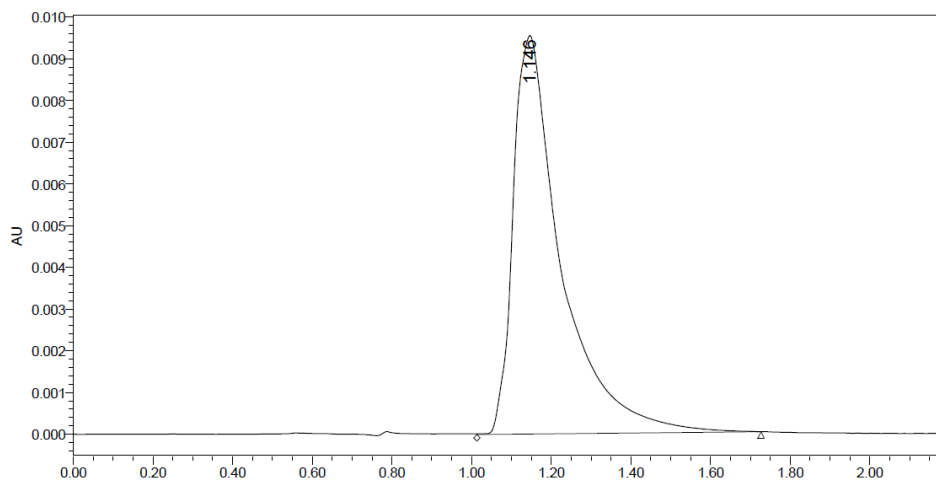

**Supplementary Figure S2.** HPLC Spectrum for Galantamine Hydrobromide standard solution (100 ppm). The peak observed at retention time of 1.146 mins with area of 79859 μV\*sec.

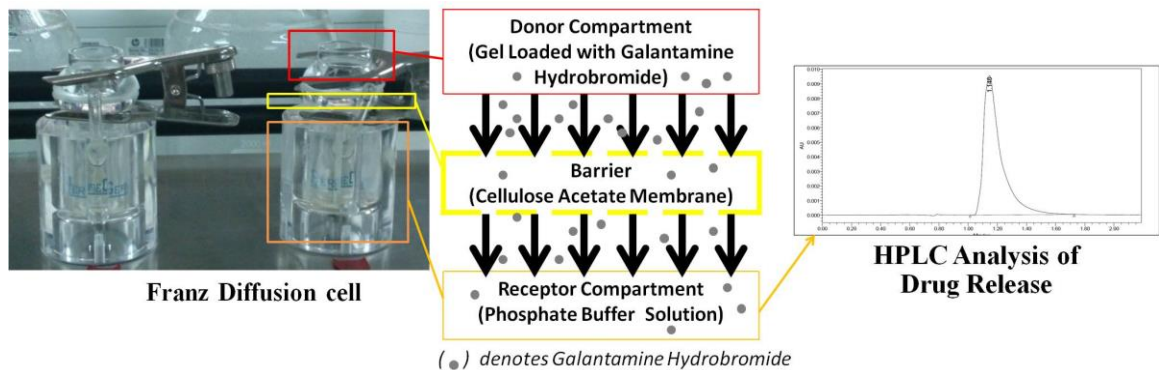

Supplementary Figure S3. Graphical Abstract.
